# Supplementary material for: Foliar application of three dithiocarbamates inhibits the absorption and accumulation of Cd in wheat
Source: Royal Society of Chemistry journal article supplement (doi:10.1039/d2em00304j), 2022-01-01
Supplement: d2em00304j1.pdf [file d2em00304j1.pdf]

**Table S1** Molecular formula of propineb, mancozeb and zineb.

| DTCs     | Formula                                   | Structural |
|----------|-------------------------------------------|------------|
| Propineb | $[C_5H_8N_2S_4Zn]_x$                      |            |
| Mancozeb | $[C_4H_6MnN_2S_4]_xZn_y$<br>$x:y=1:0.091$ |            |
| Zineb    | $[C_4H_6N_2S_4Zn]_x$                      |            |

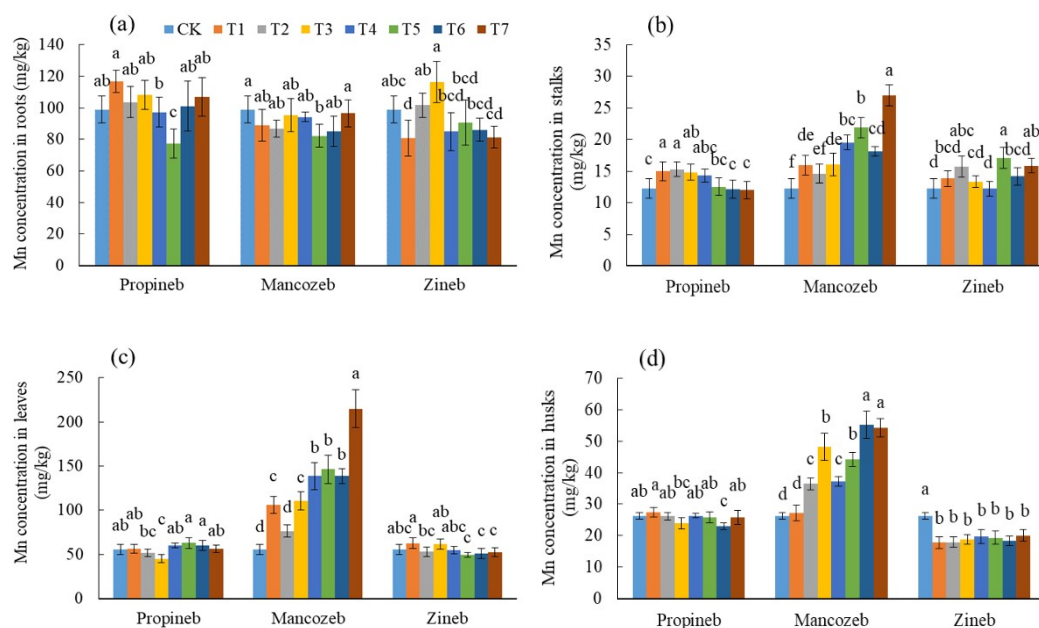

**Fig. S1** Effects of spraying DTCs on Mn concentrations in different organs of wheat. (a) roots; (b) stalks; (c) leaves; (d) husks. In the legend, CK—No DTCs treatment; T1—Apply DTCs on April 5; T2—Apply DTCs on April 16; T3—Apply DTCs on April 27; T4—Apply DTCs on April 5 and 16; T5—Apply DTCs on April 5 and 27; T6—Apply DTCs on April 16 and 27; T7—Apply DTCs on April 5, 16 and 27 (the same below).

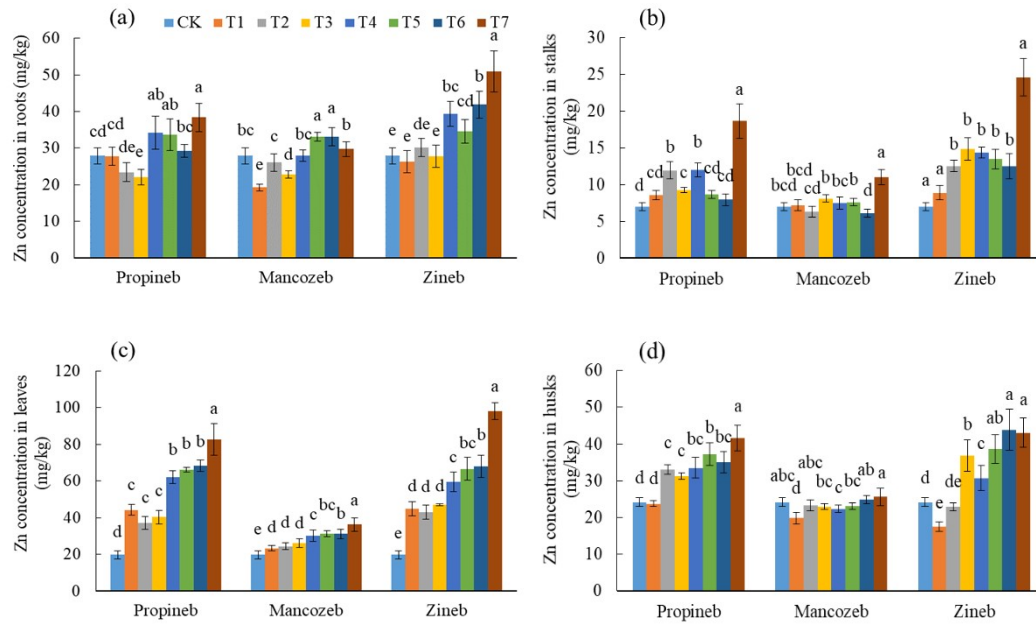

**Fig. S2** Effects of spraying DTCs on Zn concentrations in different organs of wheat. (a) roots; (b) stalks; (c) leaves; (d) husks.
